# Supplementary material for: Expression of Lipid Metabolism-Related Proteins Differs between Invasive Lobular Carcinoma and Invasive Ductal Carcinoma
Source: PubMed Central journal article supplement (PMC5297861; doi:10.3390/ijms18010232), 2017-01-23
Supplement: ijms-18-00232-s001.pdf [file ijms-18-00232-s001.pdf]

# Supplementary Materials: Expression of Lipid Metabolism-Related Proteins Differs between Invasive Lobular Carcinoma and Invasive Ductal Carcinoma

Yoon Jin Cha, Hye Min Kim and Ja Seung Koo

**Table S1.** Clinicopathologic characteristics of invasive lobular carcinoma.

| Parameters                                               | Total <i>n</i> = 108 (%) | Classic Type <i>n</i> = 97 (%) | Pleomorphic Type <i>n</i> = 11 (%) | <i>p</i> -Value  |
|----------------------------------------------------------|--------------------------|--------------------------------|------------------------------------|------------------|
| Age (years)                                              |                          |                                |                                    | <b>0.011</b>     |
| <50                                                      | 60 (55.6)                | 58 (59.8)                      | 2 (18.2)                           |                  |
| ≥50                                                      | 48 (44.4)                | 39 (40.2)                      | 9 (81.8)                           |                  |
| Nuclear grade                                            |                          |                                |                                    | <b>&lt;0.001</b> |
| 1/2                                                      | 97 (89.8)                | 97 (100.0)                     | 0 (0.0)                            |                  |
| 3                                                        | 11 (10.2)                | 0 (0.0)                        | 11 (100.0)                         |                  |
| Histologic grade                                         |                          |                                |                                    | <b>&lt;0.001</b> |
| I/II                                                     | 104 (96.3)               | 97 (100.0)                     | 7 (63.6)                           |                  |
| III                                                      | 4 (3.7)                  | 0 (0.0)                        | 4 (36.4)                           |                  |
| Pathologic T stage                                       |                          |                                |                                    | <b>0.048</b>     |
| T1                                                       | 64 (59.3)                | 61 (62.9)                      | 3 (27.3)                           |                  |
| T2/T3                                                    | 44 (40.7)                | 36 (37.1)                      | 8 (72.7)                           |                  |
| Lymph node metastasis                                    |                          |                                |                                    | 0.733            |
| Absent                                                   | 75 (69.4)                | 68 (70.1)                      | 7 (63.6)                           |                  |
| Present                                                  | 33 (30.6)                | 29 (29.9)                      | 4 (36.4)                           |                  |
| ER                                                       |                          |                                |                                    | 0.484            |
| Negative                                                 | 6 (5.6)                  | 5 (5.2)                        | 1 (9.1)                            |                  |
| Positive                                                 | 102 (94.4)               | 92 (94.8)                      | 10 (90.9)                          |                  |
| PR                                                       |                          |                                |                                    | <b>0.018</b>     |
| Negative                                                 | 18 (16.7)                | 13 (13.4)                      | 5 (45.5)                           |                  |
| Positive                                                 | 90 (83.3)                | 84 (86.6)                      | 6 (54.5)                           |                  |
| HER-2                                                    |                          |                                |                                    | <b>0.002</b>     |
| Negative                                                 | 101 (93.5)               | 94 (96.9)                      | 7 (63.6)                           |                  |
| Positive                                                 | 7 (6.5)                  | 3 (3.1)                        | 4 (36.4)                           |                  |
| Ki-67 LI                                                 |                          |                                |                                    | <b>0.001</b>     |
| ≤14                                                      | 88 (81.5)                | 84 (86.6)                      | 4 (36.4)                           |                  |
| >14                                                      | 20 (18.5)                | 13 (13.4)                      | 7 (63.6)                           |                  |
| Molecular type                                           |                          |                                |                                    | <b>&lt;0.001</b> |
| Luminal A                                                | 82 (75.9)                | 79 (81.4)                      | 3 (27.3)                           |                  |
| Luminal B                                                | 21 (19.4)                | 14 (14.4)                      | 7 (63.6)                           |                  |
| HER-2                                                    | 1 (0.9)                  | 0 (0.0)                        | 1 (9.1)                            |                  |
| TNBC                                                     | 4 (3.7)                  | 4 (4.1)                        | 0 (0.0)                            |                  |
| Body mass index *<br>(BMI, mean ± SD)                    | 22.9 ± 2.9               | 22.8 ± 2.9                     | 23.2 ± 2.0                         | 0.697            |
| Tumor recurrence                                         | 4 (3.7)                  | 3 (3.1)                        | 1 (9.1)                            | 0.318            |
| No. of patient deaths                                    | 5 (4.6)                  | 2 (2.1)                        | 3 (27.3)                           | 0.007            |
| Duration of clinical<br>follow-up<br>(months, mean ± SD) | 71.4 ± 27.3              | 71.7 ± 27.4                    | 69.5 ± 27.7                        | 0.806            |

ER, estrogen receptor; PR, progesterone receptor; HER-2, human epidermal growth factor receptor 2; LI, labeling index; TNBC, triple-negative breast cancer; SD, standard deviation. \* BMI data was not available in three patients. Significant values in bold.

**Table S2.** Clinicopathologic characteristics of invasive ductal carcinoma.

| Parameters                                            | Total<br>(n = 476) (%) | Luminal A<br>(n = 242) (%) | Luminal B<br>(n = 134) (%) | HER-2<br>(n = 50) (%) | TNBC<br>(n = 50) (%) | p-Value      |
|-------------------------------------------------------|------------------------|----------------------------|----------------------------|-----------------------|----------------------|--------------|
| Age (years)                                           |                        |                            |                            |                       |                      | <0.001       |
| <50                                                   | 250 (52.5)             | 125 (51.7)                 | 88 (65.7)                  | 18 (36.0)             | 19 (38.0)            |              |
| ≥50                                                   | 226 (47.5)             | 117 (48.3)                 | 46 (34.3)                  | 32 (64.0)             | 31 (62.0)            |              |
| Histologic grade                                      |                        |                            |                            |                       |                      | <0.001       |
| I/II                                                  | 352 (73.9)             | 220 (90.9)                 | 87 (64.9)                  | 29 (58.0)             | 16 (32.0)            |              |
| III                                                   | 124 (26.1)             | 22 (9.1)                   | 47 (35.1)                  | 21 (42.0)             | 34 (68.0)            |              |
| T stage                                               |                        |                            |                            |                       |                      | 0.577        |
| T1                                                    | 272 (57.6)             | 145 (59.9)                 | 77 (57.5)                  | 27 (54.0)             | 25 (50.0)            |              |
| T2/T3                                                 | 202 (42.4)             | 97 (40.1)                  | 57 (42.5)                  | 23 (46.0)             | 25 (50.0)            |              |
| Lymph node metastasis                                 |                        |                            |                            |                       |                      | 0.288        |
| Absent                                                | 283 (59.5)             | 139 (57.4)                 | 78 (58.2)                  | 30 (60.0)             | 36 (72.0)            |              |
| Present                                               | 193 (40.5)             | 103 (42.6)                 | 56 (41.8)                  | 20 (40.0)             | 14 (28.0)            |              |
| ER                                                    |                        |                            |                            |                       |                      | <0.001       |
| Negative                                              | 110 (23.1)             | 5 (2.1)                    | 5 (3.7)                    | 50 (100.0)            | 50 (100.0)           |              |
| Positive                                              | 366 (76.9)             | 237 (97.6)                 | 129 (96.3)                 | 0 (0.0)               | 0 (0.0)              |              |
| PR                                                    |                        |                            |                            |                       |                      | <0.001       |
| Negative                                              | 162 (34.0)             | 34 (14.0)                  | 28 (20.9)                  | 50 (100.0)            | 50 (100.0)           |              |
| Positive                                              | 314 (66.0)             | 208 (86.0)                 | 106 (79.1)                 | 0 (0.0)               | 0 (0.0)              |              |
| HER-2                                                 |                        |                            |                            |                       |                      | <0.001       |
| Negative                                              | 349 (73.3)             | 242 (100.0)                | 57 (42.5)                  | 0 (0.0)               | 50 (100.0)           |              |
| Positive                                              | 127 (26.7)             | 0 (0.0)                    | 77 (57.5)                  | 50 (100.0)            | 0 (0.0)              |              |
| Ki-67 LI                                              |                        |                            |                            |                       |                      | <0.001       |
| ≤14                                                   | 305 (64.1)             | 242 (100.0)                | 41 (30.6)                  | 16 (32.0)             | 6 (12.0)             |              |
| >14                                                   | 171 (35.9)             | 0 (0.0)                    | 93 (69.4)                  | 34 (68.0)             | 44 (88.0)            |              |
| Body mass index *<br>(BMI, mean ± SD)                 | 25.0 ± 3.6             | 26.5 ± 3.7                 | 23.4 ± 3.2                 | 23.6 ± 3.2            | 23.7 ± 3.0           | 0.753        |
| Tumor recurrence                                      | 22 (4.6)               | 8 (3.3)                    | 5 (3.7)                    | 5 (10.0)              | 4 (8.0)              | 0.124        |
| No. of patient deaths                                 | 26 (5.5)               | 9 (3.7)                    | 5 (3.7)                    | 5 (10.0)              | 7 (14.0)             | <b>0.010</b> |
| Duration of clinical follow-up<br>(months, mean ± SD) | 58.5 ± 15.3            | 60.1 ± 14.4                | 58.8 ± 15.7                | 52.9 ± 20.0           | 55.5 ± 13.1          | <b>0.010</b> |

ER, estrogen receptor; PR, progesterone receptor; LI, labeling index; TNBC, triple-negative breast cancer; SD, standard deviation. \* BMI data was not available in 168 patients. Significant values in bold.

**Table S3.** Multivariate cox proportional hazards analysis of disease-free survival and overall survival patients with invasive lobular carcinoma.

| Parameters            | Disease Free Survival |         | Overall Survival                         |         |
|-----------------------|-----------------------|---------|------------------------------------------|---------|
|                       | HR (95% CI)           | p-Value | HR (95% CI)                              | p-Value |
| Tumor stage           |                       | 0.383   |                                          | 0.944   |
| T1                    | Reference             |         | Reference                                |         |
| T2/3                  | 7.939 (0.075–835.3)   |         | 48987 (0.000–2.709 × 10 <sup>136</sup> ) |         |
| Lymph node metastasis |                       | 0.785   |                                          | 0.936   |
| Absent                | Reference             |         | Reference                                |         |
| Present               | 0.785 (0.022–28.31)   |         | 64851 (0.000–4.198 × 10 <sup>122</sup> ) |         |
| ER                    |                       | 0.579   |                                          | 0.998   |
| Negative              | Reference             |         | Reference                                |         |
| Positive              | 0.252 (0.002–32.72)   |         | 2.512 (0.000–1.182 × 10 <sup>277</sup> ) |         |
| PR                    |                       | 0.427   |                                          | 0.959   |
| Negative              | Reference             |         | Reference                                |         |
| Positive              | 43.850 (0.360–5343)   |         | 0.000 (0.000–2.517 × 10 <sup>148</sup> ) |         |
| Ki-67 LI (%)          |                       | 0.427   |                                          | 0.331   |
| ≤14                   | Reference             |         | Reference                                |         |
| >14                   | 3.956 (0.133–117.4)   |         | 2.955 (0.332–26.30)                      |         |
| CPT-1                 |                       | 0.505   |                                          | 0.966   |
| Negative              | Reference             |         | Reference                                |         |
| Positive              | 3.944 (0.069–223.9)   |         | 0.000 (0.000–3.349 × 10 <sup>218</sup> ) |         |
| Acyl-CoA oxidase 1    |                       | 0.445   |                                          | 0.940   |
| Negative              | Reference             |         | Reference                                |         |
| Positive              | 4.184 (0.106–165.1)   |         | 1.101 (0.088–13.72)                      |         |

HR, hazard ratio; CI, confidence interval; ER, estrogen receptor; PR, progesterone receptor; LI, labeling index; CPT-1, carnitine palmitoyltransferase-1.
